# Supplementary material for: Key elements of cellular senescence involve transcriptional repression of mitotic and DNA repair genes through the p53-p16/RB-E2F-DREAM complex
Source: Aging (Albany NY). 2023 May 22;15(10):4012–34. doi: 10.18632/aging.204743 (PMC10258023; doi:10.18632/aging.204743)
Supplement: Supplementary Figures [file aging-15-204743-s001.pdf]

## SUPPLEMENTARY FIGURES

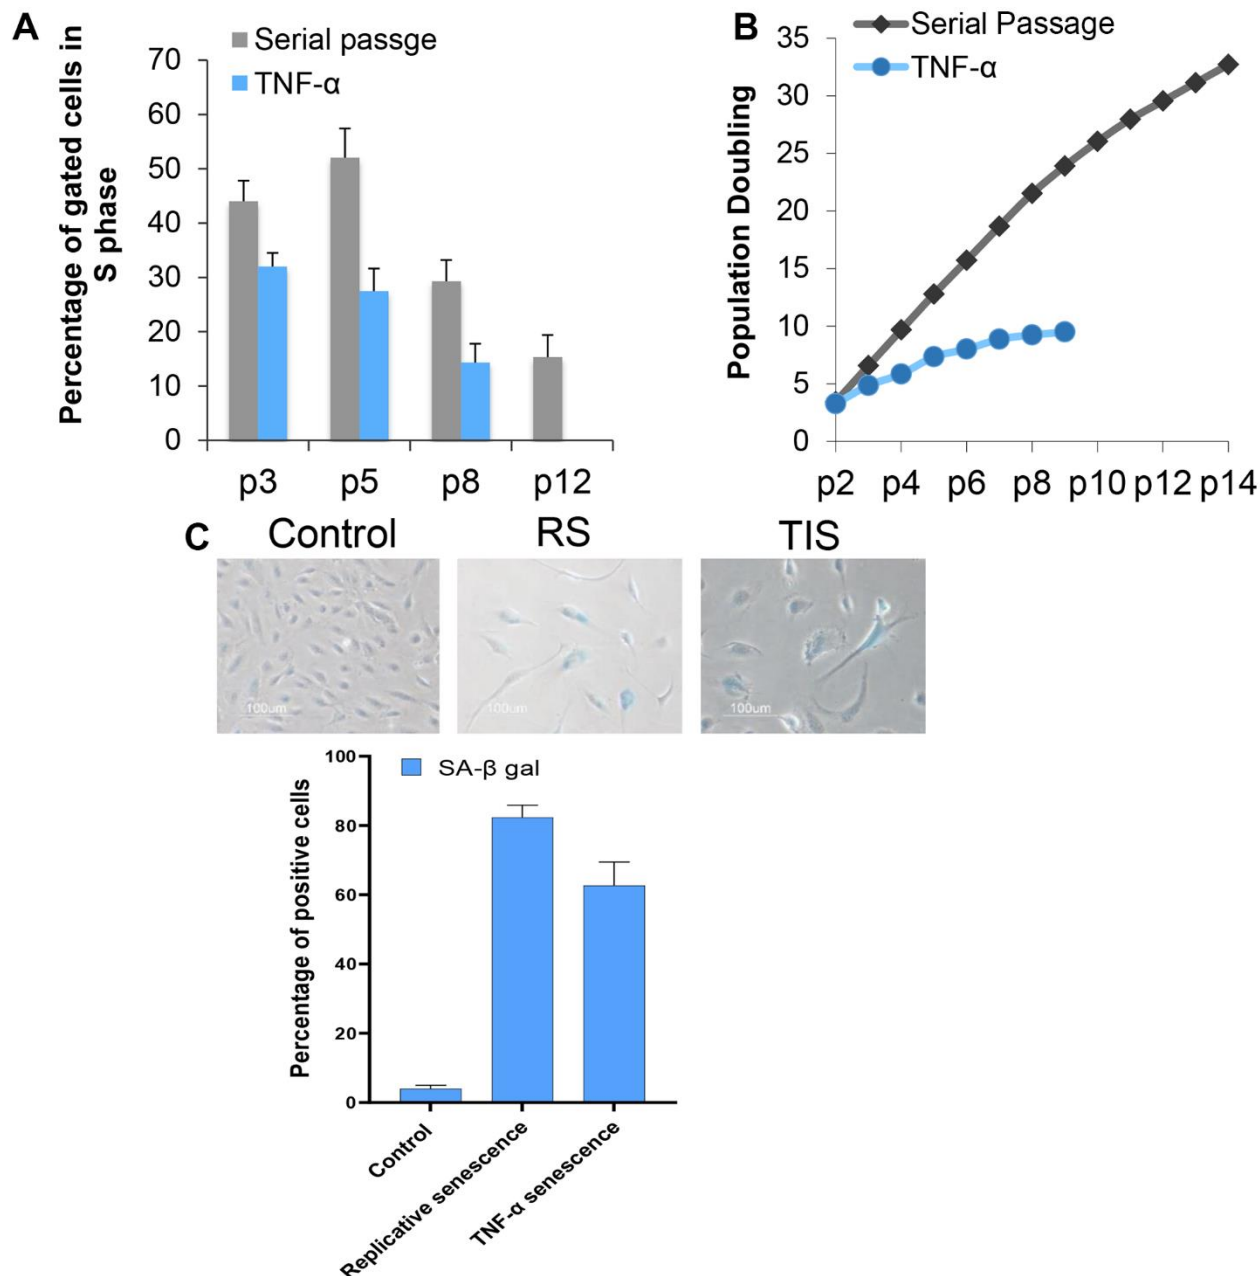

**Supplementary Figure 1. Characterization of replicative and TNF- $\alpha$  senescence.** (A) Percentage of S phase cells during senescence. BrdU labelled cells were stained and analysed by flow cytometry. Percentage of cells gated in S phase of the cell cycle were determined in serially passaged or in cells exposed to TNF- $\alpha$ . (B) Growth curve of HUVECs either serially passaged until replicative exhaust or proliferative arrest, or chronically treated with inflammatory cytokine TNF- $\alpha$  as indicated. (C) Representative images and percentage of senescence associated beta gal positive cells (SA- $\beta$  gal) in control of early passage 3 (PD5) Replicative senescence passage p14 (PD34) or in cells chronically exposed to TNF- $\alpha$  (5ng/ml) passage 7 (PD 8).

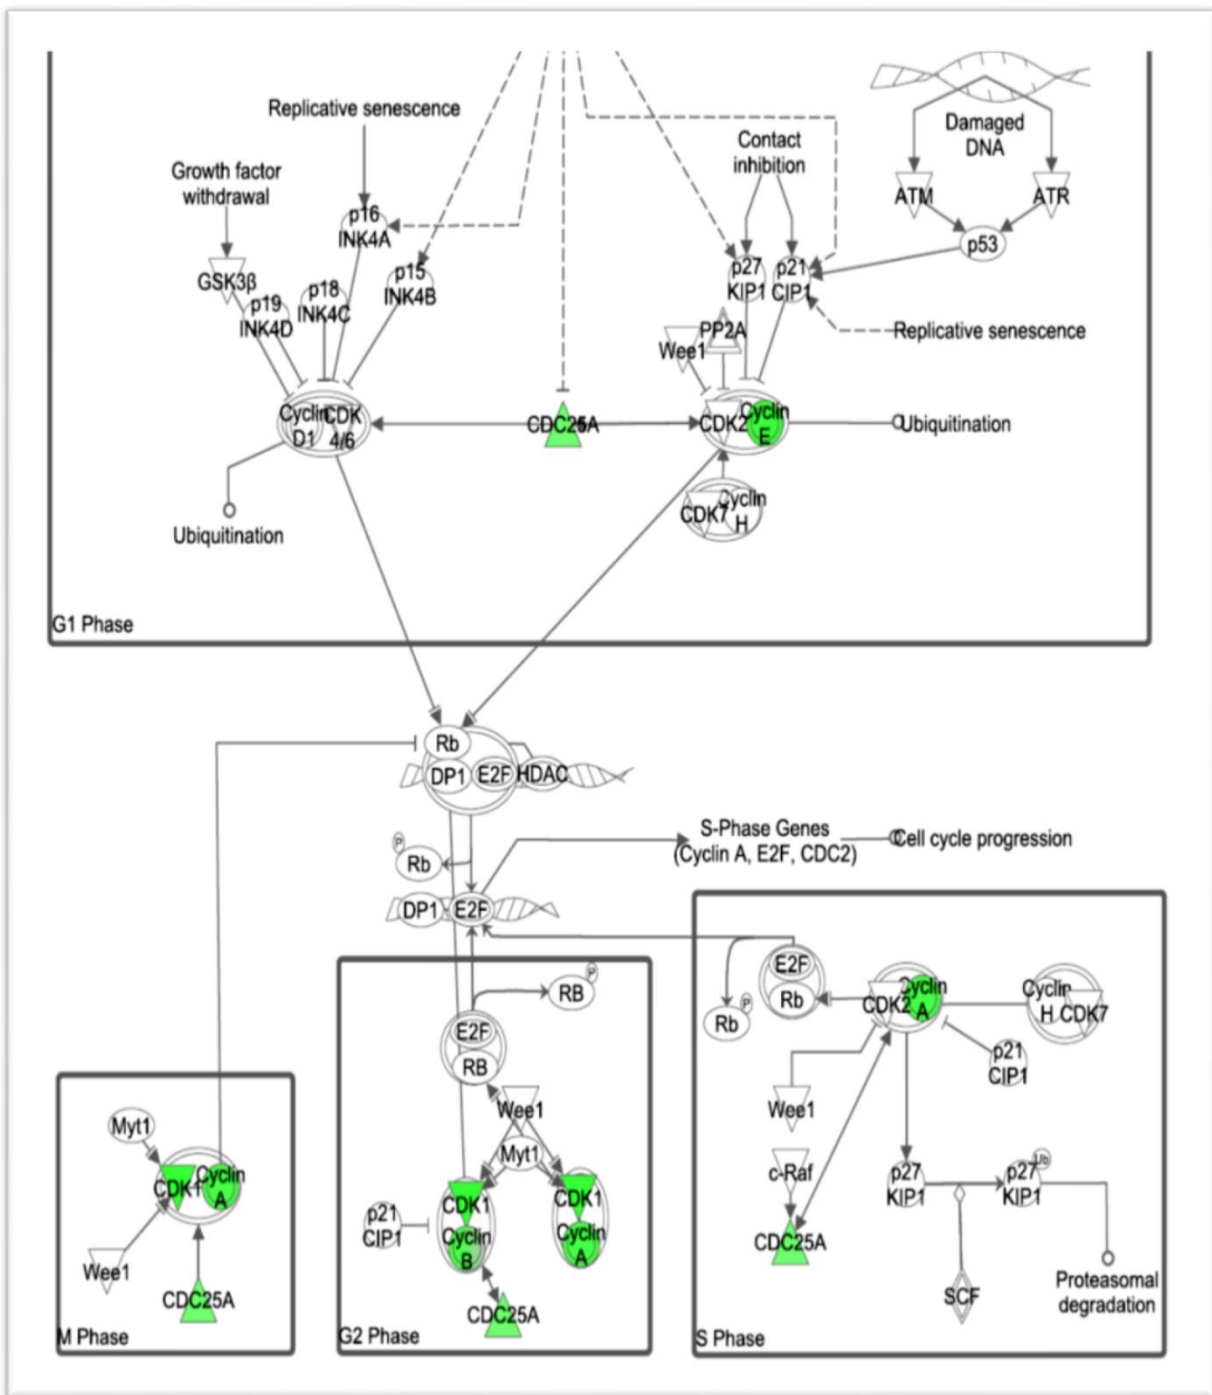

**Supplementary Figure 2. Downregulation of cell cycle regulatory genes during senescence.** Canonical pathway generated by IPA illustrates that the expression of Cyclins and CDKs which are essential for transition and regulation of G1/S and G2/M phase of the cell cycle were downregulated during senescence. Green color represents decreased expression of the genes.

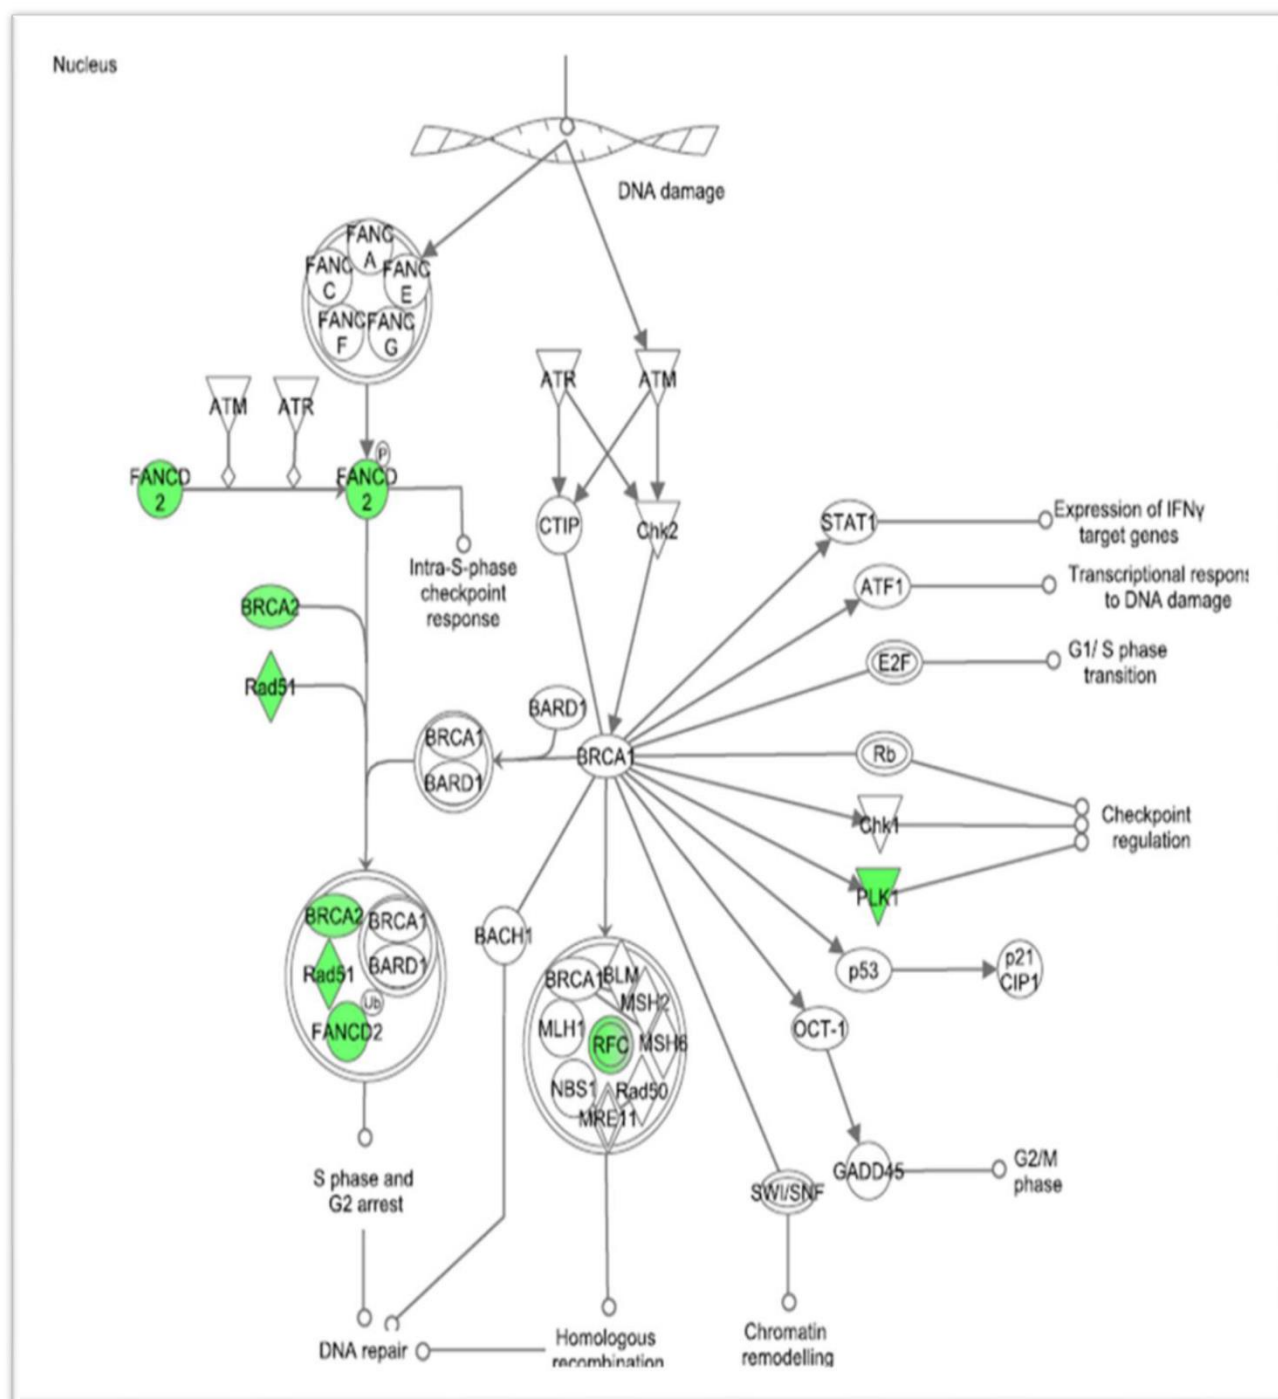

**Supplementary Figure 3. Defective DNA repair and replication regulates senescence.** IPA generated pathway shows decreased expression of the genes involved in DNA repair (RAD51, FANCD2, and BRCA2) and replication (RFC) during senescence. Green color denotes decreased expression of the genes.

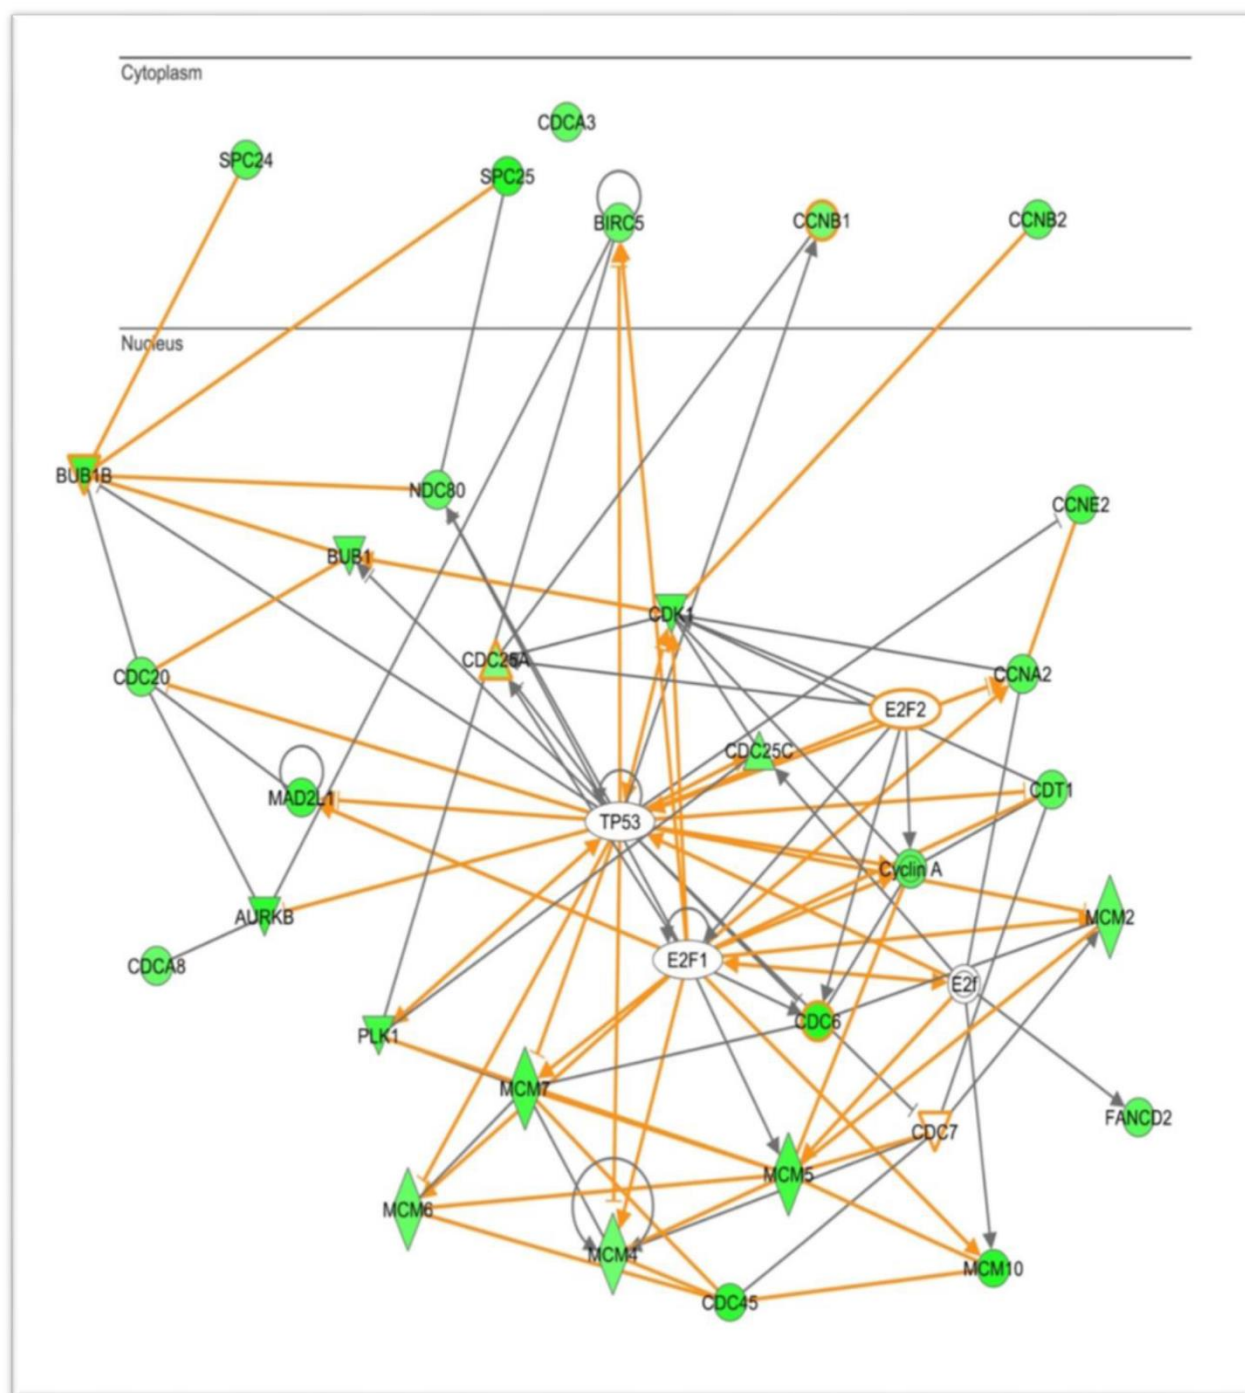

**Supplementary Figure 4. Graphic representation of the network generated by IPA shows multiple downregulated genes during senescence in p53/RB-E2F pathway.** Multiple genes downregulated during senescence are associated with the transcriptional network connected to p53-E2F. Nodes represent genes and lines show the relationship between genes. Green color represents decreased expression of the genes.

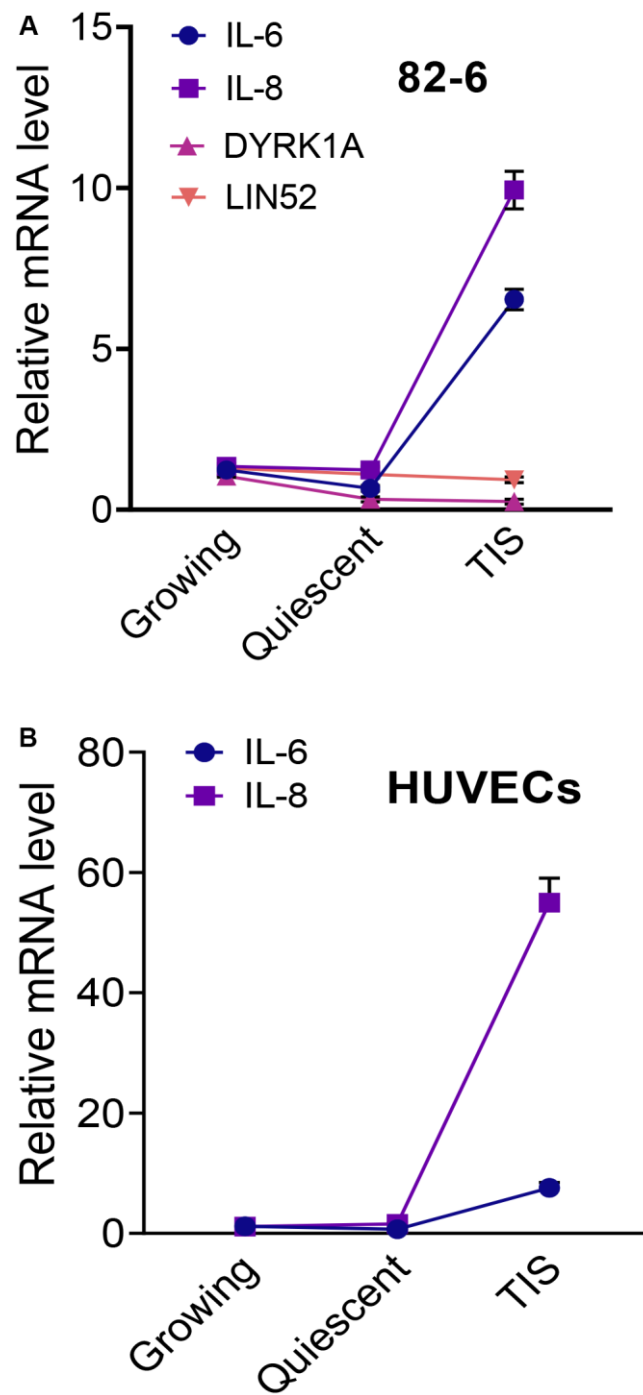

**Supplementary Figure 5. Expression of SASP and DREAM complex associated genes in growing, quiescent and TNF- $\alpha$  senescent cells.** (A) mRNA expression of IL-6, IL-8, DYRK1A, and LIN52 in growing, quiescent or TNF- $\alpha$  induced senescent 82-6 fibroblasts cells were measured using RT-PCR. (B) Expression of IL-6 and IL-8 in growing, quiescent, or TNF- $\alpha$  induced senescence HUVECs were measured using RT-PCR. GAPDH levels were used for normalization. Means  $\pm$  SD are shown.
