# Supplementary material for: Key elements of cellular senescence involve transcriptional repression of mitotic and DNA repair genes through the p53-p16/RB-E2F-DREAM complex
Source: Aging (Albany NY). 2023 May 22;15(10):4012–34. doi: 10.18632/aging.204743 (PMC10258023; doi:10.18632/aging.204743)
Supplement: Supplementary Table 1 [file aging-15-204743-s002.xlsx]

## Sheet: Sheet1
Supplementary Table 1. p53-DREAM and RB/E2F genes were downregulated in replicative and TNF-α induced senescence.
Genes downregulated in Replicative senescence					Genes downregulated in TNF-α senescence
Gene Symbol	Fold Change	p53-DREAM	RB-E2F	Overlap	Gene Symbol	Fold Change	p53-DREAM	RB-E2F	Overlap
ACAT2	-1.87333				AASS	-1.5
AIF1L	-2.24				ABI3	-1.68
ALDH1A2	-1.75333				ACAT2	-1.72667
ANLN	-1.86	✔	✔	✔	AGPAT9	-1.55333
APOBEC3B	-1.99333				AK5	-4.88667
ARHGAP11A	-1.77333	✔			AKR1C3	-2.76667
ARHGAP11B	-2.6	✔			ALDH1A1	-5.40667
ASF1B	-2.44	✔	✔	✔	ALDH1A2	-1.58667
ASPM	-2.56667	✔	✔	✔	ANTXR1	-1.68
ATAD2	-1.85333	✔	✔	✔	ARHGAP11A	-1.66	✔
AURKB	-2.54667	✔	✔	✔	ARHGAP11B	-1.7	✔
BIRC5	-1.84667				ASF1B	-1.60667	✔
BRCA2	-1.75333				BGN	-4.02667
BUB1	-2.18667	✔			BMP4	-4.16
BUB1B	-2.40667	✔	✔	✔	BMX	-2.94667
C13orf3	-1.6				BPY2	-2.02
C15orf42	-1.92667				BPY2	-2.02
C18orf24	-1.94				BPY2	-2.02
CASC5	-2.02667	✔			C10orf116	-1.64
CCNA2	-2.08	✔			C13orf27	-1.74667
CCNB1	-1.7	✔	✔	✔	C13orf3	-2.02
CCNB2	-2.05333		✔		C19orf33	-1.68
CCNE2	-2.23333	✔	✔	✔	C1orf110	-1.95333
CCNF	-1.86				C4orf49	-2.2
CDC2	-2.28		✔		C6orf142	-1.9
CDC20	-1.98667	✔	✔	✔	CADM3	-1.93333
CDC25A	-1.59333	✔	✔	✔	CCNB1	-1.64	✔
CDC25C	-1.88	✔			CCNE2	-1.66	✔	✔	✔
CDC45L	-2.54				CD302	-1.99333
CDC6	-2.66	✔	✔	✔	CDC2	-2.28667		✔
CDCA2	-1.93333	✔			CDC25B	-1.5	✔
CDCA3	-1.91333				CDC45L	-1.84667		✔
CDCA5	-2.18				CDC6	-1.98	✔	✔	✔
CDCA7	-1.93333	✔	✔	✔	CDCA7L	-1.56		✔
CDCA8	-1.84				CDKN3	-2.74	✔
CDH11	-2.04667				CDR1	-2.04
CDKN3	-2.28	✔			CDT1	-1.3	✔	✔	✔
CDR1	-1.63333				CDY1	-1.84667
CDT1	-2.03333	✔	✔	✔	CDY1	-1.82
CENPA	-1.74	✔			CDY1	-1.82
CENPE	-1.70667	✔			CENPI	-1.5	✔
CENPF	-2.20667	✔			CENPV	-1.50667	✔
CENPI	-1.88	✔			CGNL1	-2.33333
CENPK	-1.79333	✔	✔	✔	CITED2	-1.90667
CENPM	-2.04667	✔	✔	✔	DDR2	-1.72667
CEP55	-2.25333	✔	✔	✔	DDX3Y	-1.78
CFI	-2.20667				DEPDC1	-1.93333	✔
CHAF1B	-1.71333		✔		DHFR	-1.75333	✔
CIT	-1.94	✔			DHFR	-1.64667	✔
CKAP2L	-1.91333	✔			DIRAS3	-1.62
CLSPN	-2.06667		✔		DLEU1	-2.07333	✔
CPE	-2.02667				DLEU2	-2.27333
CYB5R2	-2.21333				DLG1	-2.03333		✔
DEPDC1	-1.7	✔			DLGAP5	-1.66667	✔
DEPDC1B	-1.65333	✔			DSCC1	-1.81333
DHFR	-1.83333	✔			DTL	-1.55333	✔	✔	✔
DHFR	-1.78	✔			DUSP23	-1.61333
DLEU2	-2.21333				DUSP4	-2.95333
DLGAP5	-2.41333	✔	✔	✔	E2F8	-2.54	✔	✔	✔
DOK5	-2.8				EDIL3	-4.28667
DTL	-2.34667	✔	✔	✔	EIF1AY	-2.14
E2F8	-2.16	✔	✔		EMCN	-5.15333
EMP2	-2.7		✔		FAM111B	-1.54667		✔
EPR1	-1.88667				FAM64A	-2.04667	✔	✔	✔
ERCC6L	-1.68	✔	✔	✔	FANCD2	-1.58	✔
ESPL1	-2.40667				FOXM1	-1.8	✔
ETV4	-2.00667				G0S2	-2.67333
EXO1	-2.24	✔	✔	✔	GABBR2	-2.31333
EZH2	-1.92667	✔	✔	✔	GBA2	-2.08
FAM111B	-2.12667		✔		GGT5	-1.54
FAM54A	-1.77333				GIMAP4	-2.02
FAM64A	-2.45333	✔			GIMAP6	-1.85333
FAM83D	-1.6				GIMAP7	-2.91333
FANCD2	-2	✔	✔	✔	GINS1	-1.84667	✔	✔	✔
FASN	-1.79333				GINS2	-1.98667	✔	✔	✔
FOXM1	-2.46	✔			GLRX	-1.72
FST	-2.9				GPR39	-2.34
FXYD6	-1.84				HIST1H1A	-2.57333
GAL	-1.69333				HIST1H1B	-2.51333
GINS1	-2.04667	✔	✔	✔	HIST1H1D	-2.30667
GINS2	-2.08667	✔	✔	✔	HIST1H1E	-2.1
GINS3	-1.96	✔	✔	✔	HIST1H2AB	-1.90667	✔
GINS4	-1.62667				HIST1H2AH	-1.69333
GIPC2	-1.66				HIST1H2AI	-1.91333		✔
GMNN	-1.64		✔		HIST1H2AI	-1.72
GTSE1	-2.22667	✔			HIST1H2AK	-1.65333
HELLS	-1.80667	✔	✔		HIST1H2AM	-1.57333	✔
HIST1H1A	-2.46				HIST1H2BB	-1.74667		✔
HIST1H1B	-2.93333				HIST1H2BC	-1.56	✔
HIST1H1D	-2.56667				HIST1H2BH	-1.67333
HIST1H1E	-2.56667				HIST1H2BI	-1.95333
HIST1H2AB	-1.96667				HIST1H2BK	-1.68667
HIST1H2AH	-1.81333				HIST1H2BL	-1.82667
HIST1H2AI	-2.19333				HIST1H2BM	-2.05333
HIST1H2AI	-2				HIST1H3A	-1.98
HIST1H2AM	-2.15333				HIST1H3B	-2.23333
HIST1H2BB	-1.78667	✔			HIST1H3F	-1.97333
HIST1H2BH	-1.71333				HIST1H3H	-1.58667
HIST1H2BI	-2.53333				HIST1H3I	-2.32
HIST1H2BK	-1.64				HIST1H3J	-1.64
HIST1H2BL	-2.12667				HIST1H4B	-2.07333
HIST1H2BM	-2.88667	✔			HIST1H4D	-1.94
HIST1H2BO	-1.62				HIST1H4F	-2.50667
HIST1H3A	-1.84				HIST1H4J	-1.62
HIST1H3B	-2.36				HIST1H4K	-2.06
HIST1H3D	-1.8	✔			HIST2H2AB	-2.21333	✔
HIST1H3F	-2.38667				HIST2H3D	-1.48667
HIST1H3G	-1.6				HJURP	-1.54	✔
HIST1H3H	-1.70667				HLA-DPB1	-1.94
HIST1H3I	-1.86667				HLA-DPB1	-1.64
HIST1H3J	-1.82667				HMGB2	-2.1	✔	✔	✔
HIST1H4D	-1.82				HTR1B	-1.78667
HIST2H2AB	-2.04667	✔			IGFBP2	-2.56667
HJURP	-2.13333	✔			KIAA0101	-2.43333
HLA-DPA1	-1.61333				KIF15	-1.72667	✔	✔	✔
HLA-DPB1	-2.14				KIF18B	-1.9	✔
HLA-DPB1	-1.98667				KIF20A	-2.03333	✔
HMGB2	-2.19333	✔	✔	✔	KIF22	-1.54667	✔
HMGCS1	-2.18				KIF22	-1.53333	✔
HPDL	-1.78667				KIF2C	-1.66	✔
HSPA2	-1.72667				KIF4A	-1.5	✔
IQGAP3	-1.97333	✔			KIFC1	-1.52667	✔
ITGB3BP	-1.65333	✔	✔	✔	KRT18	-2.04
ITM2A	-2.8				KRT19	-2.65333
KIAA0101	-2.13333				KRT7	-1.85333
KIAA1274	-2.36				KRT80	-1.89333
KIF11	-2.54	✔			LHX6	-1.76667
KIF14	-1.78	✔			LMNB1	-1.48667	✔	✔	✔
KIF15	-2.00667	✔	✔	✔	LOC1720	-2.4
KIF18B	-2.49333	✔			LOC388401	-1.72667
KIF20A	-2.23333	✔			LY6K	-2.25333
KIF20B	-1.90667	✔			LYPD1	-3.02667
KIF22	-1.87333	✔			LYVE1	-3.57333
KIF22	-1.82667	✔			MAD2L1	-2.48	✔	✔
KIF23	-1.77333	✔			MAOA	-2.12667
KIF2C	-1.82667	✔			MAP2K6	-2.34
KIF4A	-1.98	✔			MCM10	-1.54		✔
KIF4B	-1.65333				MCM3	-1.92	✔	✔	✔
KIFC1	-2.18	✔			MCM5	-1.72	✔	✔	✔
KIFC1	-2.16	✔			MCM6	-1.60667	✔	✔	✔
LITAF	-1.82667				MCM7	-1.76667	✔	✔	✔
LMNB1	-1.99333	✔	✔	✔	MEST	-4.56667
LOC1720	-1.72667				METTL7A	-4.62
LOC390561	-1.61333				MFNG	-1.87333
MAD2L1	-2.37333	✔	✔	✔	MGC87042	-1.52
MASTL	-1.80667	✔			MGP	-4.12
MCM10	-2.62	✔	✔	✔	MLF1IP	-1.88667
MCM2	-1.96		✔		MMP16	-1.70667
MCM4	-1.74667		✔		MMP16	-1.52
MCM5	-2.28667	✔	✔	✔	MMRN1	-4.94
MCM6	-1.86		✔		MND1	-2.20667	✔	✔	✔
MCM7	-2.24667	✔	✔	✔	MPZL2	-1.66667		✔
MELK	-1.87333	✔			MYBL2	-2.04	✔
MEOX2	-1.91333				MYRIP	-2.13333
MGMT	-1.84667				NCAPG2	-1.54	✔	✔
MKI67	-2.22667				NDC80	-2.22	✔
MLF1IP	-2.04667				NEGR1	-2.06
MND1	-1.78667	✔	✔		NOS3	-2.21333
MTP18	-1.65333				NUDCD2	-1.83333	✔	✔	✔
MYBL2	-2.89333	✔	✔	✔	NUF2	-1.92	✔	✔	✔
NCAPG	-2.10667	✔	✔	✔	NUSAP1	-2.05333	✔
NCAPG2	-1.87333	✔	✔	✔	OR4P4	-1.56
NCAPH	-2.30667	✔			PBK	-2.02	✔
NDC80	-1.93333	✔			PCDH10	-1.55333
NDN	-2.61333				PCDH7	-1.82667
NID2	-2.53333				PECI	-2.78
NPR1	-1.69333				PHF19	-1.82667	✔	✔	✔
NUF2	-2.76667	✔			PHGDH	-1.68
NUSAP1	-2.26	✔			PIK3CG	-2.36
ORC1L	-2.27333	✔			PIR	-2.29333
PBK	-2.57333				PLK4	-1.78667	✔	✔	✔
PHF19	-1.67333	✔			PLXNA4	-1.8
PHGDH	-2.45333				POLR1E	-1.51333
PKMYT1	-2.26				PRICKLE1	-5.01333
PLA2G4A	-1.68				RAB3B	-2.42
PLAC8	-1.88667				RAD51	-1.60667	✔	✔	✔
PLK1	-2.26667	✔			RAD51AP1	-1.6		✔
PLK4	-2.19333	✔	✔	✔	RGS4	-3.66
PRC1	-2.10667	✔			RGS5	-4.58667
PRIM1	-2.09333	✔			RGS7BP	-2.52667
PSRC1	-1.64667	✔			RNASE1	-2.93333
PTGS2	-2.36				RPL39L	-1.56667		✔
PTTG1	-1.60667	✔			RPS4Y1	-1.56667
RACGAP1	-1.71333	✔			RPS4Y2	-1.5
RAD51	-2.03333	✔	✔	✔	RRM2	-1.71333		✔
RAD51AP1	-2.53333		✔		RUNX1T1	-1.78
RAD54L	-1.69333		✔		SEMA3F	-1.63333
RBL1	-1.6		✔		SLAIN1	-1.58
RBP1	-1.78		✔		SNORD26	-1.64
RFC3	-2.02667	✔	✔	✔	SNORD35A	-2.42667
RFC4	-1.86		✔		SNORD38B	-2.16667
RNU2-1	-1.86				SNORD47	-2.52
RNU2-1	-1.85333				SNORD49B	-2.31333
RNU2-1	-1.83333				SNORD50B	-1.91333
RPL39L	-1.71333				SNORD74	-1.82667
RRM1	-1.61333	✔	✔	✔	SPAG5	-1.57333	✔
RRM2	-2.32	✔	✔	✔	SPC24	-2.28667
SCD	-1.71333				SPC25	-2.12667	✔
SERPINB2	-3.1				TACC3	-1.72	✔
SFXN2	-1.66667				TBC1D8	-1.93333
SGOL1	-1.88	✔			TCF19	-1.6	✔	✔	✔
SGOL2	-1.59333	✔			TCF19	-1.5		✔
SHCBP1	-2.16	✔			TCN2	-1.82667
SLC38A5	-2.4				TK1	-1.53333	✔
SLFN11	-2.13333				TMEM106C	-1.81333
SMC4	-1.76667	✔	✔	✔	TMEM163	-1.98667
SNORA33	-1.64				TMSB15A	-2.95333
SNORD26	-1.95333				TNFRSF10D	-2.08667
SNORD30	-1.7				TPX2	-1.8	✔	✔	✔
SPAG5	-2.48667	✔			TUBA4A	-1.64
SPC24	-2.09333				UHRF1	-1.52667		✔
SPC25	-2.64	✔			USP17	-1.67333
SULF1	-3.04667				VWF	-2.76667
SUV39H1	-1.74				WDR69	-1.74
TACC3	-1.76667	✔			WDR76	-1.77333	✔	✔	✔
TCF19	-1.78		✔		ZDHHC13	-2.52
TCF19	-1.78		✔
TCF19	-1.77333		✔
TK1	-2.69333
TMEM106C	-1.76667
TMEM88	-2.28
TMEM97	-2.19333
TMPO	-1.69333	✔	✔	✔
TOP2A	-2.18	✔
TPX2	-1.80667	✔
TRIP13	-1.90667
TROAP	-2.12667
TSPAN7	-1.76
TSPYL5	-1.63333
TTK	-2.29333	✔
UBE2C	-1.78667	✔
UHRF1	-1.88667		✔
WDR76	-1.94	✔	✔	✔
XRCC2	-1.69333		✔
ZWINT	-1.98667	✔
